# Supplementary material for: Development of Structure–Property Relationships for Ammonium Transport through Charged Organogels
Source: MDPI journal article supplement (doi:10.3390/membranes14030071), 2024-03-21
Supplement: s1 [file s1]

## **Supporting Information**

### **Development of Structure-Property Relationships for Ammonium Transport Through Charged Organogels**

Adam L. Bachmann, Brock Hunter, Bryan S. Beckingham

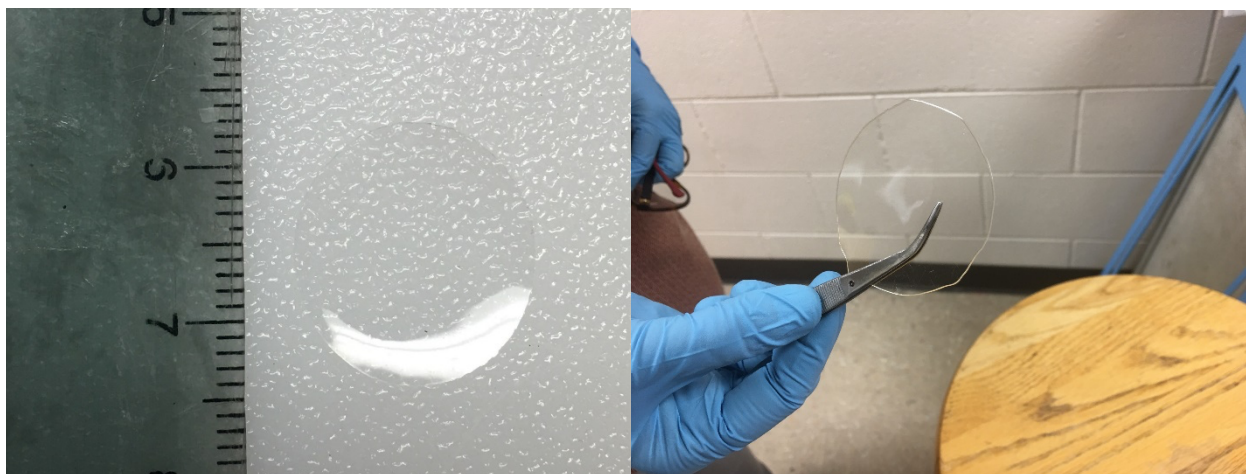

**Figure S1.** Photos of film as an organogel (left) and punch out (right).

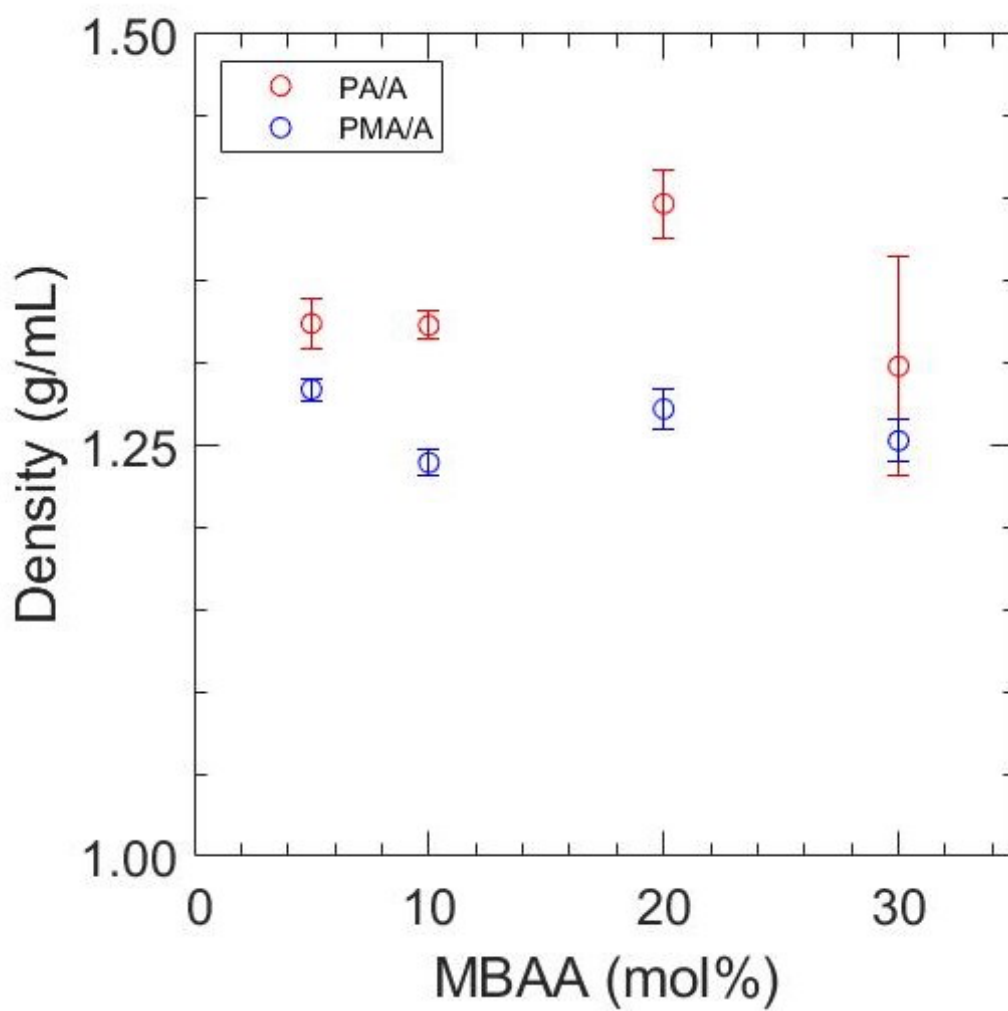

**Figure S2.** Film Densities for PA (red) and PMA (blue).

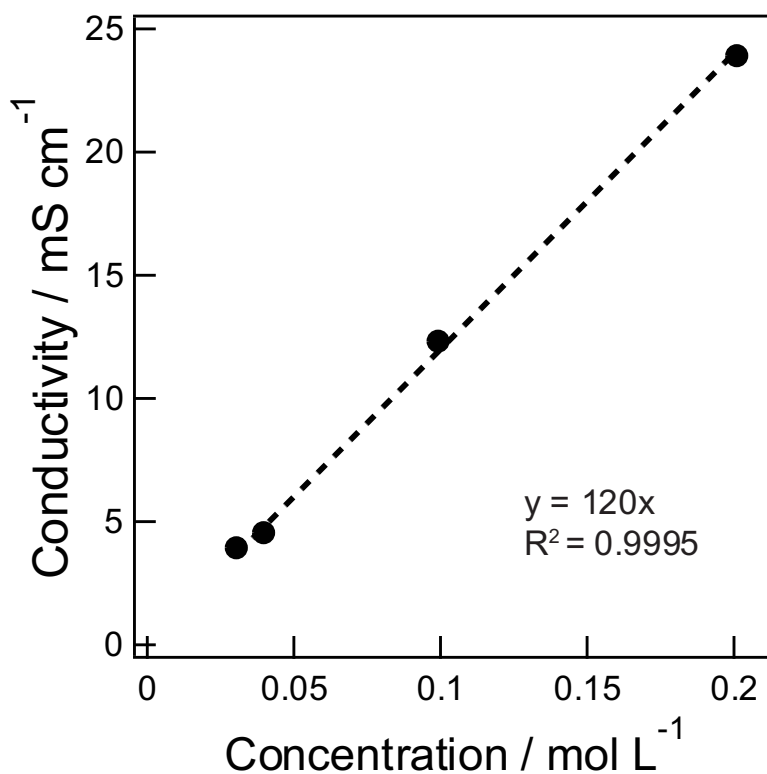

**Figure S3.** Calibration plot of measured conductivity versus concentration for aqueous ammonium chloride

**Table S1.** Water uptakes, film densities, and water volume fractions for PA and PMA films. Number in film name indicated MBAA content

| Name   | Water Uptake (%) | Film Density (g/mL) | Water Volume Fraction |
|--------|------------------|---------------------|-----------------------|
| PA-5   | 186 ± 8          | 1.32 ± 0.02         | 0.71 ± 0.01           |
| PA-10  | 132 ± 5          | 1.323 ± 0.009       | 0.637 ± 0.007         |
| PA-20  | 126.4 ± 0.8      | 1.40 ± 0.02         | 0.645 ± 0.003         |
| PA-30  | 100 ± 8          | 1.30 ± 0.07         | 0.56 ± 0.03           |
| PMA-5  | 95 ± 6           | 1.284 ± 0.007       | 0.55 ± 0.01           |
| PMA-10 | 89 ± 9           | 1.24 ± 0.01         | 0.52 ± 0.02           |
| PMA-20 | 68.9 ± 0.6       | 1.272 ± 0.008       | 0.468 ± 0.004         |
| PMA-30 | 53 ± 2           | 1.25 ± 0.01         | 0.401 ± 0.008         |

**Table S2.** Ammonium permeability, solubility, and diffusivity for PA and PMA films.

| Name  | Permeability ( $\times 10^{-7}$ cm s <sup>-1</sup> ) | Solubility    | Diffusivity ( $\times 10^{-7}$ cm s <sup>-1</sup> ) |
|-------|------------------------------------------------------|---------------|-----------------------------------------------------|
| PA-5  | 33 ± 2                                               | 0.502 ± 0.006 | 66 ± 3                                              |
| PA-10 | 20.5 ± 0.8                                           | 0.477 ± 0.009 | 43 ± 2                                              |

|        |                |                   |                |
|--------|----------------|-------------------|----------------|
| PA-20  | $14 \pm 2$     | $0.40 \pm 0.04$   | $35 \pm 5$     |
| PA-30  | $3.6 \pm 0.1$  | $0.34 \pm 0.01$   | $10.5 \pm 0.5$ |
| PMA-5  | $12.3 \pm 0.4$ | $0.47 \pm 0.04$   | $26 \pm 2$     |
| PMA-10 | $17 \pm 1$     | $0.34 \pm 0.03$   | $50 \pm 6$     |
| PMA-20 | $6.8 \pm 0.2$  | $0.320 \pm 0.002$ | $21.1 \pm 0.7$ |
| PMA-30 | $4.0 \pm 0.4$  | $0.38 \pm 0.02$   | $11 \pm 1$     |
